Pseudoneglect in visual search:

Behavioral evidence and simulated neural circuitry

Onofrio Gigliotta<sup>1,2</sup>, Tal Seidel Malkinson<sup>3</sup>, Orazio Miglino<sup>1,2</sup>, Paolo

Bartolomeo<sup>3\*</sup>

<sup>1</sup> Department of Humanistic Studies, University of Naples Federico II, Naples, Italy

<sup>2</sup> Institute of Cognitive Sciences and Technologies, National Research Council, Rome, Italy

<sup>3</sup> Inserm U 1127, CNRS UMR 7225, Sorbonne Universités, UPMC Univ Paris 06 UMR S 1127, Institut du Cerveau et de la Moelle épinière, ICM, Paris, France

\* Corresponding author

E-Mail: [paolo.bartolomeo@gmail.com](mailto:paolo.bartolomeo@gmail.com)

**Short title:** Pseudoneglect in visual search

**Statement of all financial and non-financial competing interests:** None of the authors

have any competing interests in the manuscript.

## Abstract

1  
2 Most people tend to bisect horizontal lines slightly to the left of their true center  
3  
4 (pseudoneglect), and start visual search from left-sided items. This physiological  
5  
6 leftward spatial bias may depend on hemispheric asymmetries in the organization  
7  
8 of attentional networks, but the precise mechanisms are unknown. In this study,  
9  
10 we aimed at testing and specifying this hypothesis by modeling relevant aspects of  
11  
12 the ventral and dorsal attentional networks (VAN and DAN) of the human brain.  
13  
14 First, we demonstrated pseudoneglect in visual search by asking 101 right-handed  
15  
16 psychology students to perform a cancellation task. Participants consistently  
17  
18 tended to start the task from a left-sided item, thus showing pseudoneglect.  
19  
20  
21 Second, we trained five populations of simulated neurorobots to perform a similar  
22  
23 task, by using a genetic algorithm. The neurorobots' behavior was controlled by  
24  
25 artificial neural networks, which simulated the human VAN and DAN in the two  
26  
27 brain hemispheres. The five populations of neurorobots differed in the connectional  
28  
29 constraints that were applied to the anatomy and function of the attention  
30  
31 networks. Results indicated that (1) neurorobots provided with a biologically  
32  
33 plausible hemispheric asymmetry of the VAN-DAN connections displayed the best  
34  
35 match with human data, confirming that such connectional asymmetries may well  
36  
37 play a causal role in pseudoneglect; however, (2) anatomical asymmetry *per se*  
38  
39 was not sufficient to generate pseudoneglect; in addition, the VAN must have an  
40  
41 excitatory influence on the ipsilateral DAN for such a bias to consistently occur.  
42  
43  
44 These findings provide a proof of concept of the causal link between connectional  
45  
46 asymmetries and pseudoneglect, and specify important biological constraints that  
47  
48 result in physiological asymmetries of human behavior.  
49  
50  
51  
52  
53  
54  
55  
56  
57  
58  
59  
60  
61  
62  
63  
64  
65

### Author summary

1  
2  
3  
4  
5  
6  
7  
8  
9  
10  
11  
12  
13  
14  
15  
16  
17  
18  
19  
20  
21  
22  
23  
24  
25  
26  
27  
28  
29  
30  
31  
32  
33  
34  
35  
36  
37  
38  
39  
40  
41  
42  
43  
44  
45  
46  
47  
48  
49  
50  
51  
52  
53  
54  
55  
56  
57  
58  
59  
60  
61  
62  
63  
64  
65

When exploring our environment, most of us tend to start their exploration from the left side. In this study, we first provided a demonstration of this tendency in a population of undergraduate students, who tended to start a visual search task by detecting a target on the left side of the display. We then investigated the possible mechanisms of this spatial bias by training artificial agents (neurorobots) to perform a similar visual search task. The neurorobots' behavior was controlled by artificial neural networks, whose architecture was inspired by the human fronto-parietal attentional system. In five distinct populations of neurorobots, different constraints were applied on the connections of the attentional networks, within and between the brain hemispheres. Only one of the artificial populations demonstrated a spatial bias that closely mirrored that shown by the human participants. The specific connectional constraints applied to this population included known characteristics of the human fronto-parietal networks, but had also additional properties not previously described. Thus, our findings specify important biological constraints that result in physiological asymmetries of human behavior.

**Keywords:** Spatial exploration, Visual search, Attention, Brain connections,  
Spatial neglect

## 1. Introduction

1 A thorough exploration of the space around us is essential to everyday life.  
2  
3 However, spatial exploration is not perfectly symmetrical in humans. For example,  
4  
5 when marking the center of a horizontal line, most of us deviate slightly to the left  
6  
7 of its geometric center [1, 2]. Bowers and Heilman [1] termed “pseudoneglect” the  
8  
9 physiological leftward bisection error, because it occurs in the direction opposite to  
10  
11 the rightward shifts typical of patients with right hemisphere damage and signs of  
12  
13 visual neglect [3]. In a similar way, when we explore a horizontal A4 sheet in order  
14  
15 to cancel out visual targets, we tend to start the search from the left part of the  
16  
17 sheet [4, 5]. In addition, leftward spatial bias can occur in such diverse contexts as  
18  
19 tactile rod bisection [6], picture scanning [7, 8], simulated driving [9], spatial  
20  
21 navigation [10] (but see [11]), rapid serial visual presentation [12], processing of  
22  
23 facial emotions [13], and even mental imagery [14, 15]. In these cases, exploratory  
24  
25 behavior typically starts from the left side more often than it does from the right  
26  
27 side or from the center. As a consequence, the term “pseudoneglect” has also  
28  
29 been applied to these forms of leftward spatial bias, by analogy to pseudoneglect  
30  
31 on line bisection. Interestingly, right hemisphere damage can reverse this lateral  
32  
33 bias. As a matter of fact, a reversed bias with a right starting side constitutes the  
34  
35 most sensitive index of spatial bias in patients with right hemisphere damage, even  
36  
37 in the absence of signs of left neglect [4, 16, 17].

44 Evidence shows that visuospatial attention is a major determinant of  
45  
46 pseudoneglect [18, 19], although cultural factors such as reading habits may also  
47  
48 contribute [20]. It has thus been suggested that pseudoneglect mainly results from  
49  
50 asymmetries in the hemispheric control of attention [7, 21]. However, the specific  
51  
52 neural structures and the mechanisms at the basis of pseudoneglect remain  
53  
54 unknown.

58 In the human brain, visuospatial attention is controlled by fronto-parietal  
59  
60 networks, which demonstrate substantial asymmetries across the hemispheres  
61  
62  
63  
64  
65

1 [22, 23]. We now know several details on the anatomical organization [24] and  
2 functional characteristics [25] of these networks, and how their dysfunction in the  
3 right hemisphere can lead to signs of neglect for left-sided events [26, 27]. When  
4 normal participants perform cued detection tasks [28], a bilateral dorsal attentional  
5 network (DAN), composed by the intraparietal sulcus / superior parietal lobule and  
6 the frontal eye field / dorsolateral prefrontal cortex, shows increased blood  
7 oxygenation level dependent (BOLD) responses during the cue – target period  
8 [25]. Thus, the DANs appear to be important for spatial orienting towards  
9 contralateral events. The same studies also demonstrated the presence of a  
10 ventral attentional network (VAN), which includes the temporoparietal junction and  
11 the ventral frontal cortex (inferior and middle frontal gyri), and shows increased  
12 BOLD responses when participants have to respond to invalidly cued targets [25].  
13 Thus, the VAN is considered important for detecting unexpected but behaviorally  
14 relevant events, by inducing the DANs to reorient attention towards these events.  
15 Importantly, the VAN is strongly lateralized to the right hemisphere, whereas the  
16 DAN is bilateral and symmetric (although other studies have provided some  
17 evidence of right lateralization of the DAN [29-31]). The DANs are also crucial for  
18 abilities interacting with attention, such as visual working memory [32].  
19 Anatomically, three branches of a long-range white matter pathway, the Superior  
20 Longitudinal Fasciculus (SLF), connect these networks. Evidence obtained with  
21 advanced white matter tractography [24] demonstrated that the SLF has a ventro-  
22 dorsal gradient of hemispheric asymmetry. The ventral branch of the SLF connects  
23 the VAN and is anatomically larger in the right hemisphere than in the left  
24 hemisphere, whereas the dorsal branch (connecting the DAN) is more  
25 symmetrical. The lateralization of the intermediate branch of the SLF displays  
26 interindividual differences, and is strongly correlated to the individual amount of  
27 spatial bias in line bisection and in the speed of detection between the right and  
28  
29  
30  
31  
32  
33  
34  
35  
36  
37  
38  
39  
40  
41  
42  
43  
44  
45  
46  
47  
48  
49  
50  
51  
52  
53  
54  
55  
56  
57  
58  
59  
60  
61  
62  
63  
64  
65

1 the left hemifield. Specifically, larger SLF volumes in the right hemisphere correlate  
2 with larger leftward bias [24].  
3

4 A further potential source of performance asymmetry resides in the pattern  
5 of inter-hemispheric connections. Behavioral and electrophysiological evidence  
6 suggests that inter-hemispheric communication is not strictly symmetrical in  
7 humans, but it is faster from the right to the left hemisphere [33]. Also, the posterior  
8 callosal connections from the right parietal node of the DAN to its left hemisphere  
9 homologue seem to be predominantly inhibitory [34]. Concerning the VAN, its right  
10 and left temporo-parietal caudal nodes are not strongly connected by callosal  
11 fibers [35], and thus work in relative isolation from one another.  
12  
13  
14  
15  
16  
17  
18  
19  
20  
21

22 It is tempting to relate these biological constraints to the widespread  
23 leftward bias that occurs in human exploratory behavior. However, little is known  
24 about the specific dynamic interplay between the attentional networks resulting in  
25 spatial bias. On the one hand, methods used in humans have substantial  
26 limitations of spatiotemporal resolution and of inferential power, which severely  
27 limit their scope. On the other hand, it is difficult to draw firm conclusions from  
28 monkey neurophysiology, because of important differences between humans and  
29 primates in the organization of attention networks [36]. In the present study, we  
30 took a different approach to unravel these issues. First, we tested a group of  
31 human participants to establish the presence and characteristics of pseudoneglect  
32 in a visual search task (Experiment 1). In Experiment 2, we trained neurally  
33 controlled robots (neurorobots) to perform a task as similar as possible to the  
34 human one. We then articulated detailed implementations of several instances of  
35 attention network architecture, which directed the neurorobots' performance, in  
36 order to identify the structural and functional network constraints crucial for  
37 simulating human performance.  
38  
39  
40  
41  
42  
43  
44  
45  
46  
47  
48  
49  
50  
51  
52  
53  
54  
55  
56  
57  
58  
59  
60  
61  
62  
63  
64  
65

## 2. Experiment 1: Pseudoneglect in human visual search

### 2.1 Introduction

Pseudoneglect has been mainly measured using tasks of perceptual estimation of the length of horizontal lines [2, 19]. Analogous leftward biases seem also to occur in visual search tasks, as a tendency to find first targets on the left side of the display [4, 37], but evidence in this domain is less systematic. Thus, in the present context it was important to test our specific task in order to ensure the validity of the human-robotic comparison of performance.

### 2.2. Methods

#### 2.2.1. Ethics Statement

The procedure was approved by the Ethical Committee of the Department of Humanistic Studies of the University Federico II, Naples.

#### 2.2.2. Participants

A total of 101 right-handed psychology students (76 females; mean age  $\pm$  SD,  $22.24 \pm 4.40$ ) gave their informed consent to perform a visual search experiment for course credit. Participants were recruited in November 2016.

#### 2.2.3. Procedure

The task was designed to be as close as possible to that performed by neurorobots (see section 3 below). Participants were instructed to cancel as fast as possible targets displayed on a touch-sensitive tablet (Mediacom Winpad 801 8-inches, 120 dpi, 1280x800 pixels, refresh frequency 60 Hz), by using a stylus pen. Participants were comfortably seated with a viewing distance of ~40 cm. Each session consisted of 30 trials. Each trial was initiated by the participant touching a green round button placed at the center of the screen. Subsequently, a set of 5

1 dark-red (HEX #800000) filled round targets, with a 40-pixel radius ( $0.76^\circ$  visual  
2 angle), was presented. Targets were randomly scattered on a display area of  
3  
4 512x512 pixels ( $9.7^\circ \times 9.7^\circ$ ), placed at the center of the screen. Upon participant's  
5  
6 touch, cancelled targets became bright red (HEX #FF0000). To assess lateral bias,  
7  
8 we first defined the center of the display as 0, so that the values of the X  
9  
10 coordinate went from -256 pixels ( $-4.85^\circ$ ) on the extreme left to +256 pixels  
11  
12 ( $+4.85^\circ$ ) on the extreme right. Second, we measured the average position on the X  
13  
14 axis of the first cancelled stimulus for each trial.  
15  
16  
17  
18  
19

### 20 2.3. Results

21  
22 As expected with this easy task, accuracy was at ceiling, with all participants  
23  
24 correctly cancelling all the targets. Results showed a left-biased distribution of the  
25  
26 first found target (see Fig. 9A below). The average X value was -80.23 pixels ( $-$   
27  
28  $1.52^\circ$ ), which significantly differs from the central position at  $X = 0$  (Wilcoxon-  
29  
30 Mann-Whitney two-tailed test,  $Z=-6.37$ ,  $p<0.001$ ).  
31  
32  
33  
34

### 35 2.4. Discussion

36  
37 During a visual search task similar to that used for our simulations, normal  
38  
39 participants exhibited a leftward bias (pseudoneglect), consisting in a significant  
40  
41 tendency to start the visual search from a left-sided target. This result was  
42  
43 observed in an experimental setting as close as possible to that used for  
44  
45 neurorobots, and replicates and extends previous results obtained with different  
46  
47 types of visual search tasks, such as the line cancellation test [4] and the bells test  
48  
49 [37].  
50  
51  
52  
53  
54  
55  
56  
57  
58  
59  
60  
61  
62  
63  
64  
65



### 3. Experiment 2: Visual Search in Neurorobots

#### 3.1. Introduction

A neurorobot is a real or simulated robot whose behavior is controlled by an artificial neural network. For the present experiment, we developed distinct populations of simulated neurorobots controlled by artificial neural networks with different connectivity constraints.

#### 3.2. Models

The simulated robot (Fig. 1) has a single artificial eye and an actuator (simulated hand) able to perform the cancellation task. The robot's eye can move and zoom, and can thus be described as a pan/tilt/zoom camera, because it can move along the horizontal and vertical axes and can zoom in a range between 1x to 12x. The use of a zoom was inspired by models of attention, which stipulate that attention can either be distributed over the whole field, but with low resolving power, or be continuously constricted to small portions of the visual field with a concomitant increase in processing power [38].

=====  
===== Fig. 1 about here =====  
=====

The artificial eye is equipped with a retina made up of a 7x7 grid of light receptors (see Fig.1). Each receptor outputs an activation value computed by averaging the luminance of the perceived stimuli across the receptive field, with radius set to 80 pixels. Receptors are evenly distributed within the artificial retina, which has a square form with a side varying from 1120 pixels (no zoom) to 96 pixels (maximum zoom). Thus, each stimulus can occupy a retinal surface ranging from 0.8% to 100% of the artificial retina. Horizontal and vertical movements of the eye are

1 controlled by four simulated muscles [39] (see Fig. 1), in analogy to the medial,  
2 lateral, inferior and superior recti of the human eye.  
3  
4

### 5 6 3.2.1. Neural network 7

8 We used a standard neural network model in which each node of the network has  
9 a sigmoid activation function  $\varphi(x)=1/(1+e^{-x})$  and an adjustable threshold  $\vartheta$ . The  
10 output,  $O$ , is computed for each node  $i$  by using the following equation:  
11  
12  
13

$$14 \quad O_i = \varphi(A_i)$$

15  
16  
17 Where:

$$18 \quad A_i = \vartheta_i + \sum_{i,j} w_{ij} O_j$$

19  
20  
21  
22  
23  
24  $w_{ij}$  is the synaptic weight connecting unit  $j$  with unit  $i$ . The pattern of connections  
25 between nodes has been chosen according to biological evidence on dorsal and  
26 ventral attentional networks in human brains (see below, section 3.5).  
27  
28

29  
30 Fig. 2A depicts the general template network. The 7x7 retina, consisting of  
31 49 artificial neurons, constituted the input layer. The output layer controlled the  
32 zoom with two artificial neurons, the extraocular muscles with four neurons, and a  
33 decision unit for target detection, which triggered the touch response when  
34 exceeding a criterion threshold of 0.7. The hidden layer contained the attention  
35 networks and a hidden network devoted to control vertical eye movements (4  
36 neurons, not depicted in Fig. 1). We modeled the DAN and the VAN by building a  
37 neural model organized across two hemispheres, with visual information from each  
38 visual field projecting to the contralateral hemisphere. Each DAN had 5 artificial  
39 neurons; each VAN had 4 artificial neurons. The VAN-DAN connections in the right  
40 hemisphere outnumbered those in the left hemisphere, in order to simulate  
41 analogous results for the human SLF II [24].  
42  
43  
44  
45  
46  
47  
48  
49  
50  
51  
52  
53  
54  
55

56  
57 The inter-hemispheric connections were also modeled by following  
58 anatomical and functional results obtained in the human brain, and outlined in the  
59  
60  
61  
62  
63  
64  
65

1 Introduction. Thus, (1) they connected only the DANs, but not the VANs, which  
2 thus worked in relative isolation from one another (see Fig. 9.4D in Ref. [35]) and  
3  
4 (2) they were inhibitory, such that each DAN inhibited the contralateral one [see  
5  
6 34]: each DAN induced contralaterally-directed eye movements and inhibited  
7  
8 ipsilaterally-directed eye movements. The DANs controlled zooming and  
9  
10 cancellation behaviors. All the hidden units within the DANs also had reentrant  
11  
12 connections, which integrate the previous input with the current one, thus  
13  
14 simulating a sort of simplified visual memory, in analogy to similar mechanisms  
15  
16 occurring in the primate brain [32]. Thus, reentrant connections resulted in some  
17  
18 persistence of the previous inputs across steps within a given trial. The model also  
19  
20 included an efference copy of movements, sent from the output layer to the input  
21  
22 layer within each hemisphere.  
23  
24  
25  
26  
27  
28

### 29 3.2.2. Cancellation task

30  
31 Similar to the human experiment (see section 2), neurorobots performed a 30-trial  
32  
33 cancellation task. Targets were presented on a virtual display measuring 512 x 512  
34  
35 pixels. At the start of each trial, the gaze of the artificial eye was initialized at the  
36  
37 center of the display, with no zoom. Again, similarly to the human experiment,  
38  
39 each trial consisted of a set of 5 round targets, with a luminance value of 0.5 (in  
40  
41 conventional units ranging from 0 to 1.0) and a radius of 40 pixels, randomly  
42  
43 scattered in the virtual display. Upon cancellation, targets increased their  
44  
45 luminance to the maximum value of 1.0.  
46  
47  
48  
49  
50

### 51 3.2.3. The Adaptive/Learning process

52  
53 For the present work, neurorobots were trained by means of a Genetic Algorithm,  
54  
55 a form of evolutionary computation that implements a Darwinian process of  
56  
57 adaptation that can model cognitive development and trial-and-error learning,  
58  
59 especially when only distal rewards are available [40, 41]. A typical experiment  
60  
61  
62  
63  
64  
65

1 starts with the generation of a random set of individual neurorobots (each defined  
2 by a specific set of parameters of a neurocontroller). Each individual is then  
3 evaluated according to a fitness function representing the desired performance on  
4 a requested task. Due to genetic operators such as mutation and crossover, the  
5 best individuals will populate the next generation. The process iterates until a  
6 specific performance or a fixed number of generations is reached. In the present  
7 work, each genetic string encodes the value of synaptic connections  $w_{ij}$  and  
8 neuron thresholds in the range  $(-5, 5)$ . Initially, for each evolutionary experiment a  
9 set of 100 random individuals (i.e., competing sets of parameters for the neural  
10 network of the neurorobot) were generated and evaluated for their ability to find  
11 targets. Targets had to be found as fast as possible on each of 30 cancellation  
12 trials, lasting 700 time steps each. At the end of the evaluation phase, individuals  
13 were ranked according to their performance, and the best 20 were used to  
14 populate the next generation after having undergone a mutation process. Each  
15 parameter was encoded by an 8-bit string, thus mutations were implemented by  
16 bits switching with probability  $p=0.01$ . The number of generations was set to 3,000.

17  
18  
19  
20  
21  
22  
23  
24  
25  
26  
27  
28  
29  
30  
31  
32  
33  
34  
35  
36 Three behavioral components contributed to the overall fitness,  $F$ : an  
37 exploration component, a component proportional to the number of target correctly  
38 cancelled, and a reward for responses promptness.

39  
40  
41  
42 The exploration component, which was introduced to avoid the bootstrap  
43 problem [40], rewarded the ability of the neurorobot to explore its visual field. In  
44 particular, the area that can be explored through eye movements was split in 100  
45 cells. Exploration fitness ( $EF$ ) was then computed for each trial by dividing the  
46 number of visited cells by 100. A second fitness component ( $TF$ ) was represented  
47 for each trial by the number of correctly cancelled targets divided by 5 (i.e., the  
48 total number of presented targets). Finally, a reward for promptness ( $PF$ ) was  
49 given when all the five targets were cancelled.  $PF$  was inversely proportional to the  
50 number of time steps  $nt$ , used to cancel all the stimuli:  
51  
52  
53  
54  
55  
56  
57  
58  
59  
60  
61  
62  
63  
64  
65

$$PF=nt/700$$

The overall fitness was calculated as

$$F=EF+TF+PF.$$

After training, neurorobots' performance in the cancellation task was evaluated on 30 new trials, in order to measure their accuracy in finding the targets and the position of the first cancelled target, as estimated by the average value of the X coordinate of the first cancelled stimulus across trials.

#### 3.2.4. Valence of VAN-DAN connections

A set of 5 populations of neurorobots, each composed of 40 individuals, featured neurocontrollers with different connectional constraints.

=====  
===== Fig. 2 about here =====  
=====

Neurocontrollers A, B and C (Fig. 2) had left-right asymmetric connections between VAN and DAN (i.e., the simulated SLF II), with a greater number of connections in the right hemisphere (120) than in the left hemisphere (108). The ratio of this asymmetry difference (0.05) corresponds to the average asymmetry ratio of SLF II in 20 human subjects, as described by Thiebaut de Schotten et al. [24] (see their supplementary Table 1). In neurocontroller A (Fig. 2A) there were no constraints in terms of type of connections (inhibitory or excitatory) along the ventral and dorsal attentional networks. In neurocontroller B a further constraint was added: VAN to DAN pathways were set to be excitatory during the training process (see Fig. 2B). Finally, in neurocontroller C also the connections projecting from the retina to the VAN were set to be excitatory (see Fig. 2C). To better evaluate the effect on performance of SLF II asymmetry, we trained two additional control populations based on neurocontroller C: C<sub>0</sub> with completely symmetrical VAN-DAN connections (laterality ratio = 0); C<sub>1</sub> with VAN-DAN connections only

1 present in the right hemisphere, and absent VAN-DAN connections in the left  
2 hemisphere (complete right lateralization of SLF II).  
3  
4  
5

### 6 3.3. Results 7

#### 8 3.3.1. Behavioral Results 9

10 Figure 3 reports the performance of the three populations equipped with  
11 neurocontrollers A, B, and C on correct cancellations. Each boxplot contains data  
12 collected for 40 neurorobots tested on 30 cancellation tasks.  
13  
14  
15  
16  
17  
18  
19  
20  
21

22 ===== Fig. 3 about here =====  
23  
24  
25  
26  
27

28 There were no significant differences in the percentage of correct cancellations  
29 across the three populations [Kruskal-Wallis test,  $\chi^2_{(2, n = 120)} = 1.44, p = .49$ ].  
30 However, the position of the first cancelled target (X value for each trial) did differ  
31 across the tested populations,  $\chi^2_{(2, n = 120)} = 18.41, p < .001$ . While the position of  
32 the first cancelled target was not different from 0 (central position) in neurorobots  
33 equipped with neurocontroller A (Wilcoxon-Mann-Whitney,  $p=0.1$ , two-tailed), the  
34 remaining neurorobots tended to start their exploration of the display on the left of  
35 the center (neurocontroller B, Md = -33.27,  $z = -2.057, p = 0.02$ ; neurocontroller C,  
36 Md = 63.29,  $z = -5.35, p < .001$ ), thus showing a leftward bias reminiscent of  
37 human pseudoneglect. The control populations with complete SLF II symmetry  
38 ( $C_0$ ), or extreme rightward SLF II asymmetry ( $C_1$ ) showed the predicted patterns of  
39 performance: no pseudoneglect for  $C_0$  (Md=20.435,  $z=-0.823, p=0.411$ ), and large  
40 pseudoneglect for  $C_1$  (Md=-96.526,  $z=-7.406, p=1.299*10^{-13}$ ) (Fig. 4).  
41  
42  
43  
44  
45  
46  
47  
48  
49  
50  
51  
52  
53  
54  
55  
56  
57  
58  
59

60 ===== Fig. 4 about here =====  
61  
62  
63  
64  
65

### 3.3.2. Neural results

===== Fig. 5 about here =====

To better understand the neural dynamics leading to the exploratory bias, we examined the average activations of the DANs across all the individuals for each population, equipped with neurocontrollers C (biologically-inspired asymmetry) and C<sub>0</sub> (symmetrical attention networks). We then computed a laterality index of DAN average activations between the two hemispheres:  $(\text{Mean Right DAN activation} - \text{Mean Left DAN activation}) / (\text{Mean Right DAN activation} + \text{Mean Left DAN activation})$ , with a possible range from -1 (prevalent left DAN activity) to +1 (prevalent right DAN activity). Figure 6 reports the course of the laterality index across time steps. As expected, left and right DAN activations were balanced with neurocontroller C<sub>0</sub>. On the other hand, in neurocontroller C activations were unbalanced toward the right hemisphere DAN. A crucial aspect for pseudoneglect concerns the initial time steps in which the exploratory bias occurs. A higher imbalance toward the right hemisphere DAN is present at the outset of the cancellation task for neurorobots C, as a consequence of asymmetries in their network architecture, while it is obviously absent for neurorobots C<sub>0</sub>, with symmetrical networks. The initial imbalance favoring the right hemisphere DAN is the likely basis of the spatial bias towards the initial cancellation of a left-sided item in neurorobots C (see sheets 2 and 3 in Supplementary Material for the average activation of right and left DAN in neurocontrollers C and C<sub>0</sub>).

===== Fig. 6-7 about here =====

1  
2  
3  
4 Figure 7 shows the average activation of the hidden DAN neurons in the left and in  
5  
6 the right hemisphere during the first 30 time steps of the cancellation task, for  
7  
8 agents equipped with the biologically inspired neurocontroller C, and for those  
9  
10 equipped with the symmetrical neurocontroller C<sub>0</sub>. The initial activation is  
11  
12 symmetrical for the C<sub>0</sub> agents, but it is higher in the right hemisphere than in the  
13  
14 left hemisphere for the C agents. Thus, an asymmetry of VAN connections results  
15  
16 in a corresponding activation asymmetry in the anatomically symmetrical DANs.  
17  
18 The DAN asymmetry in the initial phases of the task is the simulated neural  
19  
20 correlate of behavioral pseudoneglect. After the initial phase, the left-right  
21  
22 differences are absorbed by the increased activity of the hidden units; when left  
23  
24 and right activities reach saturation, the behavioral asymmetry decreases (see Fig.  
25  
26 6, where asymmetry of performance decreases around time step 150 for  
27  
28 neurocontroller C).  
29  
30  
31  
32  
33

### 3.3.3. Comparison between human and robotic performance

34  
35  
36 Human participants and robotic populations as a whole did not show the same  
37  
38 distribution of the position of the first cancelled targets (Kruskal-Wallis test,  $\chi^2(5, n$   
39  
40  $= 301) = 67.88, p < .001$ ). Post-hoc tests (Dunn's test with Bonferroni correction)  
41  
42 demonstrated a difference in distribution between humans and neurocontrollers A  
43  
44 ( $p < .001$ ), B ( $p=0.0394$ ), C<sub>0</sub> ( $p < .001$ ), C<sub>1</sub> ( $p = 0.0153$ ). However, the position  
45  
46 distribution derived from human performance and neurocontroller C's performance  
47  
48 showed a similar degree of leftward asymmetry (Fig. 8; Dunn's test,  $p = 1.0$ ;  
49  
50 Levene test of homogeneity,  $p = 0.39$ ). Thus, all robotics agents performed  
51  
52 differently from humans, except from the neurocontroller C neurobot population,  
53  
54 whose performance provided a good approximation to human performance (for  
55  
56 population data, see sheet 1 in Supplementary Material).  
57  
58  
59  
60  
61  
62  
63  
64  
65





#### 4. General Discussion

1  
2 In this study, we established specific connectivity constraints leading to a lateral  
3 spatial bias (pseudoneglect) in artificial organisms trained to perform a visual  
4 search task by using genetic algorithms. A form of pseudoneglect that was  
5  
6 qualitatively and quantitatively similar to that shown by normal participants did  
7  
8 emerge in artificial neurorobots, but only in those harboring hemispheric  
9  
10 asymmetries of connectivity that simulated those typically occurring in the human  
11  
12 brain. As a further condition, a general excitatory influence of VAN on the  
13  
14 ipsilateral DAN was necessary for pseudoneglect to occur in neurorobots. This  
15  
16 novel result suggests that hemispheric asymmetry alone is not sufficient to  
17  
18 generate a leftward bias, and thus further specifies the likely connectional  
19  
20 constraints of pseudoneglect.  
21  
22  
23  
24  
25

26  
27 In their recent review, Borji and Itti [42] provided a taxonomy of nearly 65  
28  
29 computational models of visual attention. Many of these models focused on  
30  
31 reproducing eye movements (e.g., the saliency-based models reported in Borji and  
32  
33 Itti [42]), following a bottom up approach. Typically, these models extract a set of  
34  
35 features, represented as maps, from an incoming image. Then, feature maps are  
36  
37 combined in a saliency map where a winner-take-all mechanism will designate the  
38  
39 spatial region to be attended. Saliency-based attention models in general do not  
40  
41 account for exploration biases, with the exception of a recent model [43], where an  
42  
43 object center bias (the tendency to focus on the center of objects) is reproduced by  
44  
45 adding an ad-hoc bias map to the saliency map. While important for building  
46  
47 predictive models, this result seems little relevant to lateral biases such as  
48  
49 pseudoneglect. Other models [44, 45] simulate attention as emerging from the  
50  
51 competition of several brain areas subjected to bottom-up and top-down biases.  
52  
53 These models do not drive eye movements; the scan path is simulated as a  
54  
55 sequence of activations of the simulated posterior parietal cortex. Lanyon and  
56  
57 Denham [46, 47] added to these models simulated eye movements and an  
58  
59  
60  
61  
62  
63  
64  
65

1 adjustable attention window scaled according to stimuli density. Despite being  
2 successful at reproducing scan paths in healthy individuals and neglect patients,  
3 these models do not address the issue of pseudoneglect. Other models of  
4 attention did not consider pseudoneglect because of their training procedure or  
5 design constraints [41, 48-50]. Di Ferdinando et al. [51] explored line bisection and  
6 target cancellation performance in four biologically inspired neural networks. The  
7 networks' patterns of connectivity varied along different degrees of asymmetry,  
8 inspired by specific theories. Pseudoneglect occurred in line bisection but not in  
9 visual search. In these models, motor outputs were only used for target selection;  
10 there was no active exploration of the environment, whereas when our neurobots  
11 explored their environment the corresponding input information changed as a  
12 function of eye movements. Nonetheless, the present study shares with Di  
13 Ferdinando et al. [51] and other work from the Zorzi group [52] the stress on  
14 accounts of attentional phenomena relying on sensory-motor transformations, as  
15 stated by the premotor theory of attention [53].

16  
17  
18  
19  
20  
21  
22  
23  
24  
25  
26  
27  
28  
29  
30  
31  
32  
33 Thus, at variance with most available models of attention, our artificial  
34 robots are trained to correctly cancel target stimuli, and are free to self-organize in  
35 order to find a proper solution, within the sole limits of the imposed connectivity  
36 constraints. These constraints were inspired by available data concerning the  
37 anatomical and functional organization of the attentional networks in the human  
38 brain [24, 25, 34]. To the best of our knowledge, this is the first attempt to simulate  
39 the dorsal and ventral attention networks in the two hemispheres of the human  
40 brain. Another original feature of the present models is the embodiment factor,  
41 consisting of the explicit modeling of eye and hand movements (see also Refs. [41,  
42 46, 54-56]). In particular, the present models extended the models devised by Di  
43 Ferdinando et al [41], by increasing the complexity of the organisms' retina, the  
44 biological plausibility of the motor system and that of the neural controllers. Conti  
45 et al. [57] also adopted an embodied perspective, based on a humanoid robot

1 platform. In their study, an iCub robot was trained to remove objects from a table, a  
2 task reminiscent of a cancellation task. Intra-hemispheric disconnections were able  
3 to produce neglect-like behavior. However, the embodiment of the model was  
4 limited by the facts that selection of a visual target was carried out independently  
5 of the motor behavior, and that robot's eyes were kept fixed during the cancellation  
6 task. Moreover, although hemisphere asymmetry was modeled by increasing the  
7 number of right hemisphere processing units, no bias in normal performance is  
8 reported.

9  
10 Moreover, at variance with most published work, our model attempted to  
11 simulate the relationships between the visual pathways and the attentional  
12 networks by respecting important biological constraints. Visual pathways project  
13 mainly to the hemisphere contralateral to each visual field. However, theoretical  
14 models of visual attention posit that the left hemisphere mainly deals with the  
15 contralateral hemisphere, whereas the right hemisphere has a more bilateral  
16 competence [22, 58]. In previous computational models this asymmetry has not  
17 always been simulated in a biologically plausible way. In some cases, both  
18 simulated hemispheres received visual information from the whole visual field, with  
19 attention asymmetries being represented in inner layers [41, 49]. In the Conti et  
20 al.'s model [57], the right hemisphere received information from both visual  
21 hemifields, whereas the left hemisphere processes only the contralateral visual  
22 hemifield. However, there is no anatomical evidence of such asymmetries in the  
23 visual pathways, and information exchange in the occipital visual areas is mainly  
24 limited to the vertical meridian [59]. In our model, these important biological  
25 constraints of visual information processing were respected, because each artificial  
26 hemisphere received visual information from the contralateral hemifield; inter-  
27 hemispheric connections were only present at a later stage of processing, between  
28 the artificial DANs.

1  
2  
3  
4  
5  
6  
7  
8  
9  
10  
11  
12  
13  
14  
15  
16  
17  
18  
19  
20  
21  
22  
23  
24  
25  
26  
27  
28  
29  
30  
31  
32  
33  
34  
35  
36  
37  
38  
39  
40  
41  
42  
43  
44  
45  
46  
47  
48  
49  
50  
51  
52  
53  
54  
55  
56  
57  
58  
59  
60  
61  
62  
63  
64  
65

Finally, we note that the present population-based model can be potentially used to explore in a natural manner the universal properties (the basic brain architecture) and individual differences in network efficiency, two aspects recently underlined by Michael Posner [60] as appropriate features for future models of attention.

In conclusion, we have demonstrated the emergence of pseudoneglect behavior in artificially evolving neurobots searching for visual objects, under specific connectional constraints. These neurobots provide a plausible model for the dynamic interactions between fronto-parietal attention networks in the human brain.

## 5. References

1. Bowers D and Heilman KM. Pseudoneglect: Effects of hemispace on a tactile line bisection task. *Neuropsychologia*. 1980;18:491-8.
2. Jewell G and McCourt ME. Pseudoneglect: a review and meta-analysis of performance factors in line bisection tasks. *Neuropsychologia*. 2000;38 1:93-110. doi:S0028-3932(99)00045-7 [pii].
3. Urbanski M and Bartolomeo P. Line bisection in left neglect: The importance of starting right. *Cortex*. 2008;44 7:782-93.
4. Bartolomeo P, D'Erme P and Gainotti G. The relationship between visuospatial and representational neglect. *Neurology*. 1994;44:1710-4.
5. Azouvi P, Bartolomeo P, Beis J-M, Perennou D, Pradat-Diehl P and Rousseaux M. A battery of tests for the quantitative assessment of unilateral neglect. *Restorative Neurology and Neuroscience*. 2006;24 4-6:273-85.
6. Brooks JL, Sala SD and Logie RH. Tactile rod bisection in the absence of visuo-spatial processing in children, mid-age and older adults. *Neuropsychologia*. 2011;49 12:3392-8. doi:http://dx.doi.org/10.1016/j.neuropsychologia.2011.08.015.
7. Ossandón JP, Onat S and König P. Spatial biases in viewing behavior. *Journal of Vision*. 2014;14 2:20. doi:10.1167/14.2.20.
8. Foulsham T, Gray A, Nasiopoulos E and Kingstone A. Leftward biases in picture scanning and line bisection: A gaze-contingent window study. *Vision Research*. 2013;78:14-25. doi:http://dx.doi.org/10.1016/j.visres.2012.12.001.
9. Benedetto S, Pedrotti M, Bremond R and Baccino T. Leftward attentional bias in a simulated driving task. *Transportation Research Part F: Traffic Psychology and Behaviour*. 2013;20:147-53. doi:http://dx.doi.org/10.1016/j.trf.2013.07.006.
10. Nicholls MER, Loftus AM, Orr CA and Barre N. Rightward collisions and their association with pseudoneglect. *Brain and Cognition*. 2008;68 2:166-70. doi:http://dx.doi.org/10.1016/j.bandc.2008.04.003.
11. Hatin B, Sykes Tottenham L and Oriet C. The relationship between collisions and pseudoneglect: Is it right? *Cortex*. 2012;48 8:997-1008. doi:http://dx.doi.org/10.1016/j.cortex.2011.05.015.
12. Śmigajewicz K, Westphal N and Verleger R. Leftward bias in orienting to and disengaging attention from salient task-irrelevant events in rapid serial visual presentation. *Neuropsychologia*. 2017;94:96-105. doi:http://dx.doi.org/10.1016/j.neuropsychologia.2016.11.025.
13. Coolican J, Eskes GA, McMullen PA and Lecky E. Perceptual biases in processing facial identity and emotion. *Brain and Cognition*. 2008;66 2:176-87. doi:http://dx.doi.org/10.1016/j.bandc.2007.07.001.
14. Brooks J, Della Sala S and Darling S. Representational Pseudoneglect: A Review. *Neuropsychol Rev*. 2014;24 2:148-65. doi:10.1007/s11065-013-9245-2.
15. Boursillon C, Oliviero B, Wattiez N, Pouget P and Bartolomeo P. Visual mental imagery: What the head's eye tells the mind's eye. *Brain Res*. 2011;1367:287-97.
16. Azouvi P, Samuel C, Louis-Dreyfus A, Bernati T, Bartolomeo P, Beis J-M, et al. Sensitivity of clinical and behavioural tests of spatial neglect after right hemisphere stroke. *J Neurol Neurosurg Psychiatr*. 2002;73 2:160-6.
17. Gainotti G, D'Erme P and Bartolomeo P. Early orientation of attention toward the half space ipsilateral to the lesion in patients with unilateral brain damage. *J Neurol Neurosurg Psychiatr*. 1991;54:1082-9.
18. McCourt ME, Garlinghouse M and Reuter-Lorenz PA. Unilateral visual cueing and asymmetric line geometry share a common attentional origin in the modulation of pseudoneglect. *Cortex*. 2005;41 4:499-511.
19. Toba MN, Cavanagh P and Bartolomeo P. Attention biases the perceived midpoint of horizontal lines. *Neuropsychologia*. 2011;49 2:238-346.

23

- 1 20. Chokron S and Imbert M. Influence of reading habits on line bisection. *Cognitive Brain Research*. 1993;1:219-22.
- 2 21. McCourt ME and Jewell G. Visuospatial attention in line bisection: stimulus  
3 modulation of pseudoneglect. *Neuropsychologia*. 1999;37 7:843-55. doi:S0028-  
4 3932(98)00140-7 [pii].
- 5 22. Heilman KM and Van Den Abell T. Right hemisphere dominance for attention: the  
6 mechanism underlying hemispheric asymmetries of inattention (neglect).  
7 *Neurology*. 1980;30 3:327-30.
- 8 23. Mesulam M-M. Spatial attention and neglect: parietal, frontal and cingulate  
9 contributions to the mental representation and attentional targeting of salient  
10 extrapersonal events. *Philosophical Transactions of the Royal Society of London*  
11 *B*. 1999;354 1387:1325-46.
- 12 24. Thiebaut de Schotten M, Dell'Acqua F, Forkel SJ, Simmons A, Vergani F, Murphy  
13 DGM, et al. A lateralized brain network for visuospatial attention. *Nature*  
14 *Neuroscience*. 2011;14 10:1245-6. doi:10.1038/nn.2905.
- 15 25. Corbetta M and Shulman GL. Control of goal-directed and stimulus-driven  
16 attention in the brain. *Nat Rev Neurosci*. 2002;3 3:201-15.
- 17 26. Corbetta M and Shulman GL. Spatial neglect and attention networks. *Annu Rev*  
18 *Neurosci*. 2011;34:569-99. doi:10.1146/annurev-neuro-061010-113731.
- 19 27. Bartolomeo P, Thiebaut de Schotten M and Chica AB. Brain networks of  
20 visuospatial attention and their disruption in visual neglect. *Front Hum Neurosci*.  
21 2012;6:110. doi:doi: 10.3389/fnhum.2012.00110.
- 22 28. Posner MI. Orienting of attention. *The Quarterly Journal of Experimental*  
23 *Psychology*. 1980;32:3-25.
- 24 29. Nobre AC, Sebestyen GN, Gitelman DR, Mesulam MM, Frackowiak RS and Frith  
25 CD. Functional localization of the system for visuospatial attention using positron  
26 emission tomography. *Brain*. 1997;120:515-33.
- 27 30. Bourgeois A, Chica AB, Valero-Cabré A and Bartolomeo P. Cortical control of  
28 inhibition of return: causal evidence for task-dependent modulations by dorsal and  
29 ventral parietal regions. *Cortex*. 2013;49 8:2229-38.  
30 doi:10.1016/j.cortex.2012.10.017.
- 31 31. Bourgeois A, Chica AB, Valero-Cabré A and Bartolomeo P. Cortical control of  
32 Inhibition of Return: exploring the causal contributions of the left parietal cortex.  
33 *Cortex*. 2013;49 10:2927-34. doi:10.1016/j.cortex.2013.08.004.
- 34 32. Salazar R, Dotson N, Bressler S and Gray C. Content-specific fronto-parietal  
35 synchronization during visual working memory. *Science*. 2012;338 6110:1097-  
36 100.
- 37 33. Marzi CA. Asymmetry of interhemispheric communication. *Wiley Interdisciplinary*  
38 *Reviews: Cognitive Science*. 2010;1 3:433-8. doi:10.1002/wcs.53.
- 39 34. Koch G, Cercignani M, Bonni S, Giacobbe V, Bucchi G, Versace V, et al.  
40 Asymmetry of parietal interhemispheric connections in humans. *J Neurosci*.  
41 2011;31 24:8967-75. doi:10.1523/jneurosci.6567-10.2011.
- 42 35. Catani M and Thiebaut de Schotten M. *Atlas of the Human Brain Connections*.  
43 Oxford University Press; 2012.
- 44 36. Patel GH, Yang D, Jamerson EC, Snyder LH, Corbetta M and Ferrera VP.  
45 Functional evolution of new and expanded attention networks in humans. *Proc*  
46 *Natl Acad Sci U S A*. 2015;112 30:9454-9. doi:10.1073/pnas.1420395112.
- 47 37. Rousseaux M, Beis JM, Pradat-Diehl P, Martin Y, Bartolomeo P, Chokron S, et al.  
48 Normalisation d'une batterie de dépistage de la négligence spatiale. Etude de  
49 l'effet de l'âge, du niveau d'éducation, du sexe, de la main et de la latéralité  
50 [Presenting a battery for assessing spatial neglect. Norms and effects of age,  
51 educational level, sex, hand and laterality]. *Revue Neurologique*. 2001;157:1385-  
52 401.
- 53
- 54
- 55
- 56
- 57
- 58
- 59
- 60
- 61
- 62
- 63
- 64
- 65



- 1 38. Eriksen CW and Yeh Y-Y. Allocation of attention in the visual field. *Journal of*  
2 *Experimental Psychology: Human Perception and Performance*. 1985;11 5:583-  
3 97.
- 4 39. Massera G, Ferrauto T, Gigliotta O and Nolfi S. Designing adaptive humanoid  
5 robots through the FARSA open-source framework. *Adaptive Behavior*.  
6 2014;1059712314536909.
- 7 40. Nolfi S and Floreano D. *Evolutionary Robotics: The Biology, Intelligence, and*  
8 *Technology*. MIT Press; 2000.
- 9 41. Di Ferdinando A, Parisi D and Bartolomeo P. Modeling orienting behavior and its  
10 disorders with "ecological" neural networks. *Journal of Cognitive Neuroscience*.  
11 2007;19 6:1033-49.
- 12 42. Borji A and Itti L. State-of-the-Art in Visual Attention Modeling. *IEEE Transactions*  
13 *on Pattern Analysis and Machine Intelligence*. 2013;35 1:185-207.  
14 doi:10.1109/TPAMI.2012.89.
- 15 43. Borji A and Tanner J. Reconciling saliency and object center-bias hypotheses in  
16 explaining free-viewing fixations. *IEEE transactions on neural networks and*  
17 *learning systems*. 2016;27 6:1214-26.
- 18 44. Deco G and Rolls ET. A neurodynamical cortical model of visual attention and  
19 invariant object recognition. *Vision research*. 2004;44 6:621-42.
- 20 45. Deco G and Zihl J. A biased competition based neurodynamical model of visual  
21 neglect. *Medical Engineering & Physics*. 2004;26 9:733-43.  
22 doi:http://dx.doi.org/10.1016/j.medengphy.2004.06.011.
- 23 46. Lanyon LJ and Denham SL. A model of active visual search with object-based  
24 attention guiding scan paths. *Neural Networks*. 2004;17 5:873-97.
- 25 47. Lanyon LJ and Denham SL. Modelling visual neglect: computational insights into  
26 conscious perception. *PLoS One*. 2010;5 6:e11128.
- 27 48. Mozer MC. Frames of reference in unilateral neglect and visual perception: a  
28 computational perspective. *Psychological Review*. 2002;109 1:156-85.
- 29 49. Monaghan P and Shillcock R. Hemispheric asymmetries in cognitive modeling:  
30 connectionist modeling of unilateral visual neglect. *Psychological Review*.  
31 2004;111 2:283-308.
- 32 50. Pouget A and Sejnowski TJ. Simulating a lesion in a basis function model of  
33 spatial representations: comparison with hemineglect. *Psychological Review*.  
34 2001;108 3:653-73.
- 35 51. Di Ferdinando A, Casarotti M, Vallar G and Zorzi M. Hemispheric asymmetries in  
36 the neglect syndrome: a computational study. In: Cangelosi A, Bugmann G and  
37 Borisyuk R, editors. *Modelling Language, Cognition and Action*. Singapore: World  
38 Scientific; 2005. p. 249-58.
- 39 52. Casarotti M, Lisi M, Umiltà C and Zorzi M. Paying attention through eye  
40 movements: a computational investigation of the premotor theory of spatial  
41 attention. *J Cogn Neurosci*. 2012;24 7:1519-31. doi:10.1162/jocn\_a\_00231.
- 42 53. Rizzolatti G, Riggio L, Dascola I and Umilta C. Reorienting attention across the  
43 horizontal and vertical meridians: evidence in favor of a premotor theory of  
44 attention. *Neuropsychologia*. 1987;25 1A:31-40.
- 45 54. Gigliotta O, Bartolomeo P and Miglino O. Introducing Sensory-motor Apparatus in  
46 Neuropsychological Modelization. *Connection Science*. 2014.
- 47 55. Miglino O, Ponticorvo M and Bartolomeo P. Place cognition and active perception:  
48 a study with evolved robots. *Connection Science*. 2009;21 1:3-14.
- 49 56. Bartolomeo P, Pagliarini L and Parisi D. Emergence of orienting behavior in  
50 ecological neural networks. *Neural Processing Letters*. 2002;15 1:69-76.
- 51 57. Conti D, Di Nuovo S, Cangelosi A and Di Nuovo A. Lateral specialization in  
52 unilateral spatial neglect: a cognitive robotics model. *Cognitive processing*. 1-8.
- 53 58. Mesulam MM. A cortical network for directed attention and unilateral neglect.  
54 *Annals of Neurology*. 1981;10:309-25.
- 55
- 56
- 57
- 58
- 59
- 60
- 61
- 62
- 63
- 64
- 65



25

- 1  
2  
3  
4  
5  
6  
7  
8  
9  
10  
11  
12  
13  
14  
15  
16  
17  
18  
19  
20  
21  
22  
23  
24  
25  
26  
27  
28  
29  
30  
31  
32  
33  
34  
35  
36  
37  
38  
39  
40  
41  
42  
43  
44  
45  
46  
47  
48  
49  
50  
51  
52  
53  
54  
55  
56  
57  
58  
59  
60  
61  
62  
63  
64  
65
59. Berlucchi G. Visual interhemispheric communication and callosal connections of the occipital lobes. *Cortex*. 2014;56:1-13.
60. Posner MI. Guides to the study of attention. In: Nobre AC and Kastner S, editors. *The Oxford Handbook of Attention*. Oxford: Oxford University Press; 2014. p. 1-5.

## Figure legends

1  
2  
3  
4 Figure 1. Schema of the neurorobot equipped with an artificial eye, provided with a 7x7  
5  
6 light receptor retina, and controlled by two couples of simulated extraocular muscles.  
7  
8  
9

10 Figure 2. Neurocontrollers A, B and C. Arrows indicate connections that can be either  
11  
12 excitatory or inhibitory; red connections with triangular arrowheads denote excitatory  
13  
14 connections; round arrowheads represent inhibitory connections. LH, left hemisphere; RH,  
15  
16 right hemisphere; Canc., cancellation units: LDAN and RDAN, dorsal attention networks in  
17  
18 the left and in the right hemisphere, respectively; LVAN and RVAN, ventral attention  
19  
20 networks in the left and in the right hemisphere; LVF and RVF, left and right visual field.  
21  
22 Right and left VANS have the same number of neurons, but different patterns of connection  
23  
24 strength.  
25  
26  
27

28 Figure 3. Average x values of the first cancelled target, computed across 30 trials for each  
29  
30 population of 40 neurorobots provided with neurocontrollers A, B, and C. The middle bar of  
31  
32 the boxplot indicates the median of the tested population. The left side and the right side of  
33  
34 the box indicate respectively the first (q1) and the third (q3) quartiles. Whisker length  
35  
36 extends until the last data point that is not considered as an outlier, i.e. a point that is  
37  
38 greater than  $q3 + 1.5 \times (q3 - q1)$  or less than  $q1 - 1.5 \times (q3 - q1)$ . There were no outliers  
39  
40 in the current dataset.  
41  
42  
43

44 Figure 4. Average x values of the first cancelled targets, for all the neurorobots provided  
45  
46 with neurocontrollers C0, C, and C1. Average x values of neurorobots C0 is not  
47  
48 significantly different from 0, while average x values of neurocontrollers C and C1  
49  
50 significantly differ from 0.  
51  
52  
53

54 Figure 5. Average position on the X axis of the first cancelled targets for human  
55  
56 participants (H) and artificial neurorobots equipped with neural networks A, B, C, C0 and  
57  
58 C1.  
59  
60  
61  
62  
63  
64  
65

1 Figure 6. Laterality indexes of DAN activation computed for individuals equipped with  
2 neurocontroller C and C<sub>0</sub>. A value of 0 means that activation in left and right hemisphere  
3 DANs is balanced; positive values denote prevalence of right hemisphere DAN, negative  
4 values indicate prevalence of left hemisphere DAN.  
5  
6  
7  
8

9 Figure 7. Average activation of hidden neurons in right hemisphere DAN and in left  
10 hemisphere DAN, for the first 30 steps of individuals equipped with neurocontrollers C and  
11 C<sub>0</sub>. The activity scale goes from 0 (blue) to 1 (magenta). Note the early, large left-right  
12 asymmetry in neurobiologically inspired C agents (arrows), which subsequently decreases.  
13  
14  
15  
16  
17 The symmetrical C<sub>0</sub> agents do not show any asymmetry of performance.  
18  
19

20 Figure 8. Distribution of the position of the first cancelled target for 101 human participants  
21 (see Experiment 1) and for the population of neurorobots equipped with the biologically  
22 inspired neurocontroller C.  
23  
24  
25  
26  
27  
28  
29  
30  
31  
32  
33  
34  
35  
36  
37  
38  
39  
40  
41  
42  
43  
44  
45  
46  
47  
48  
49  
50  
51  
52  
53  
54  
55  
56  
57  
58  
59  
60  
61  
62  
63  
64  
65

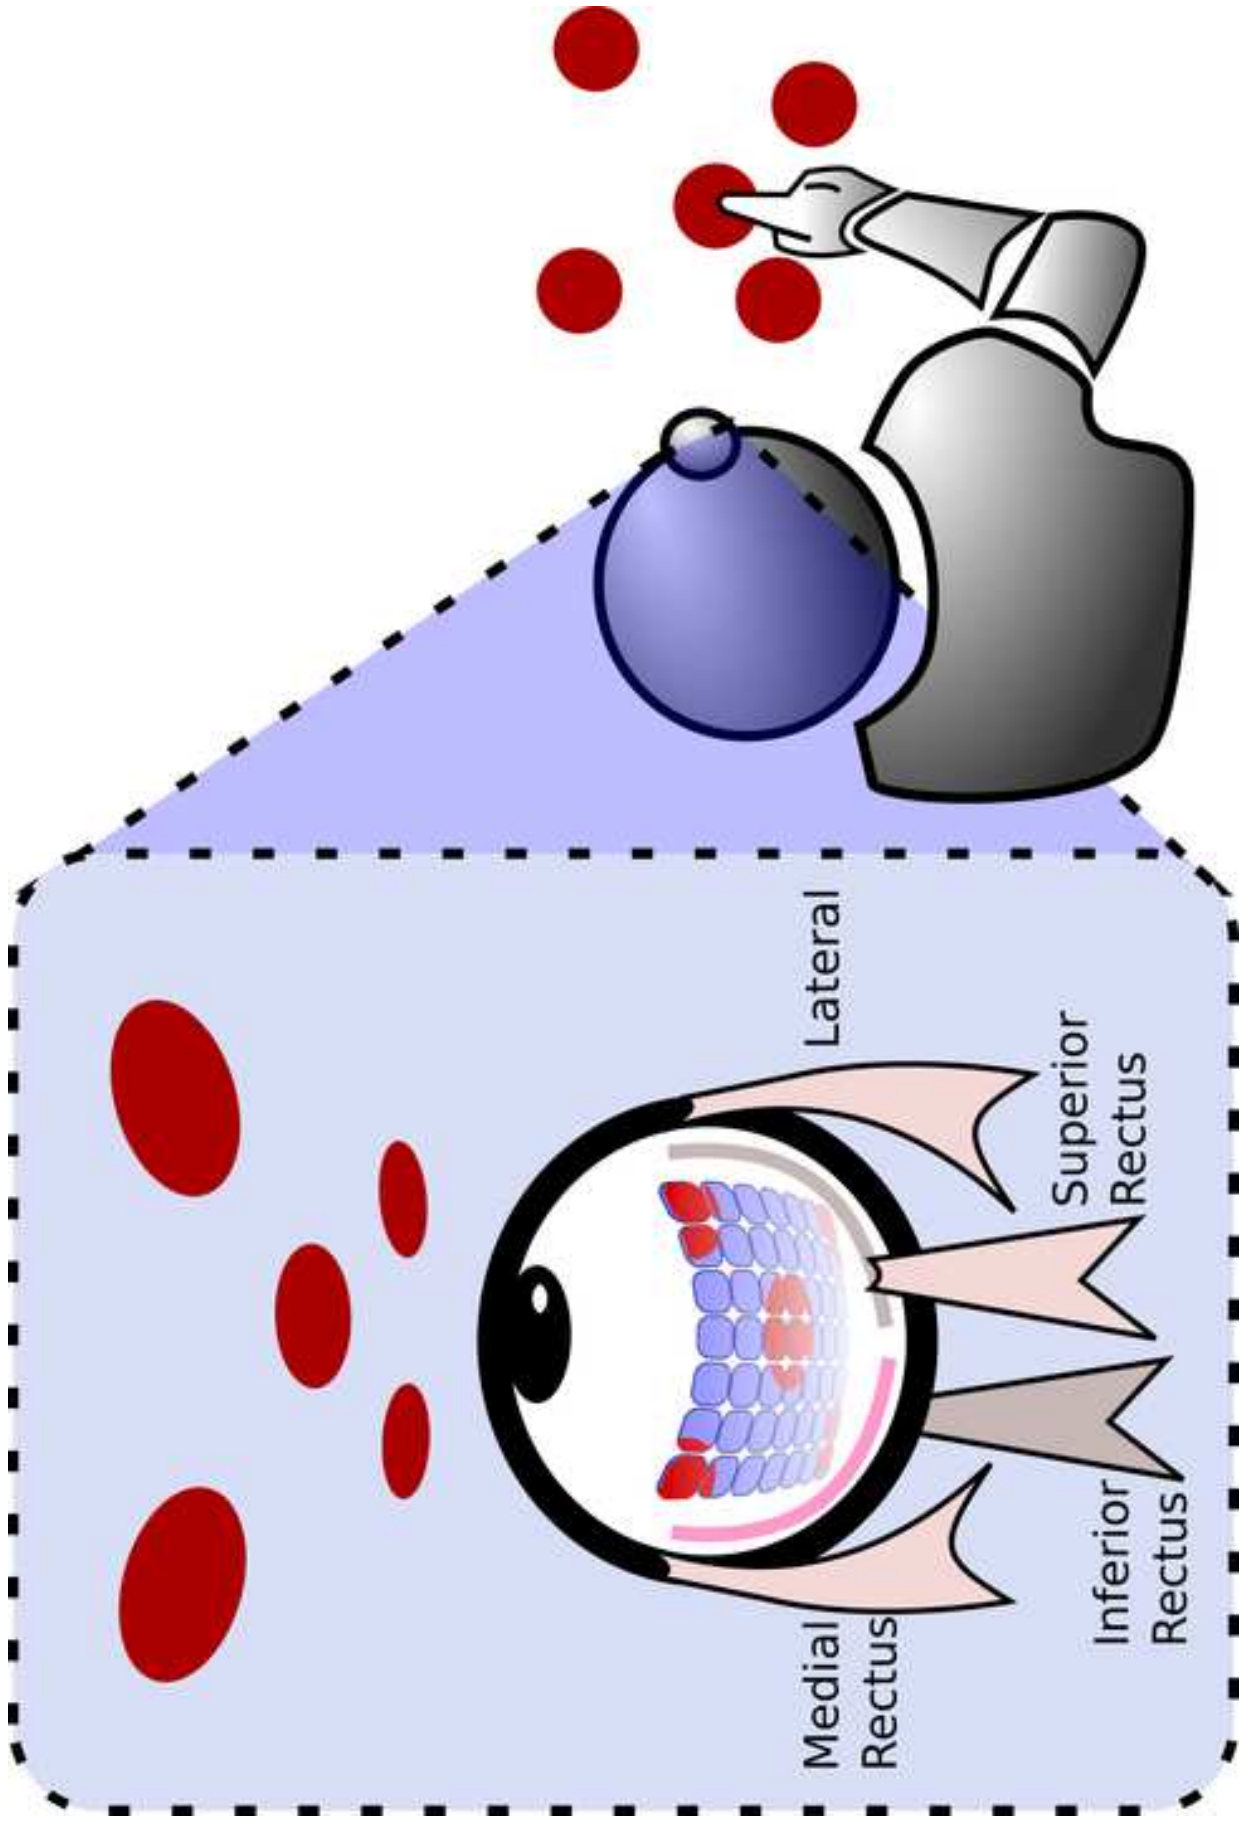

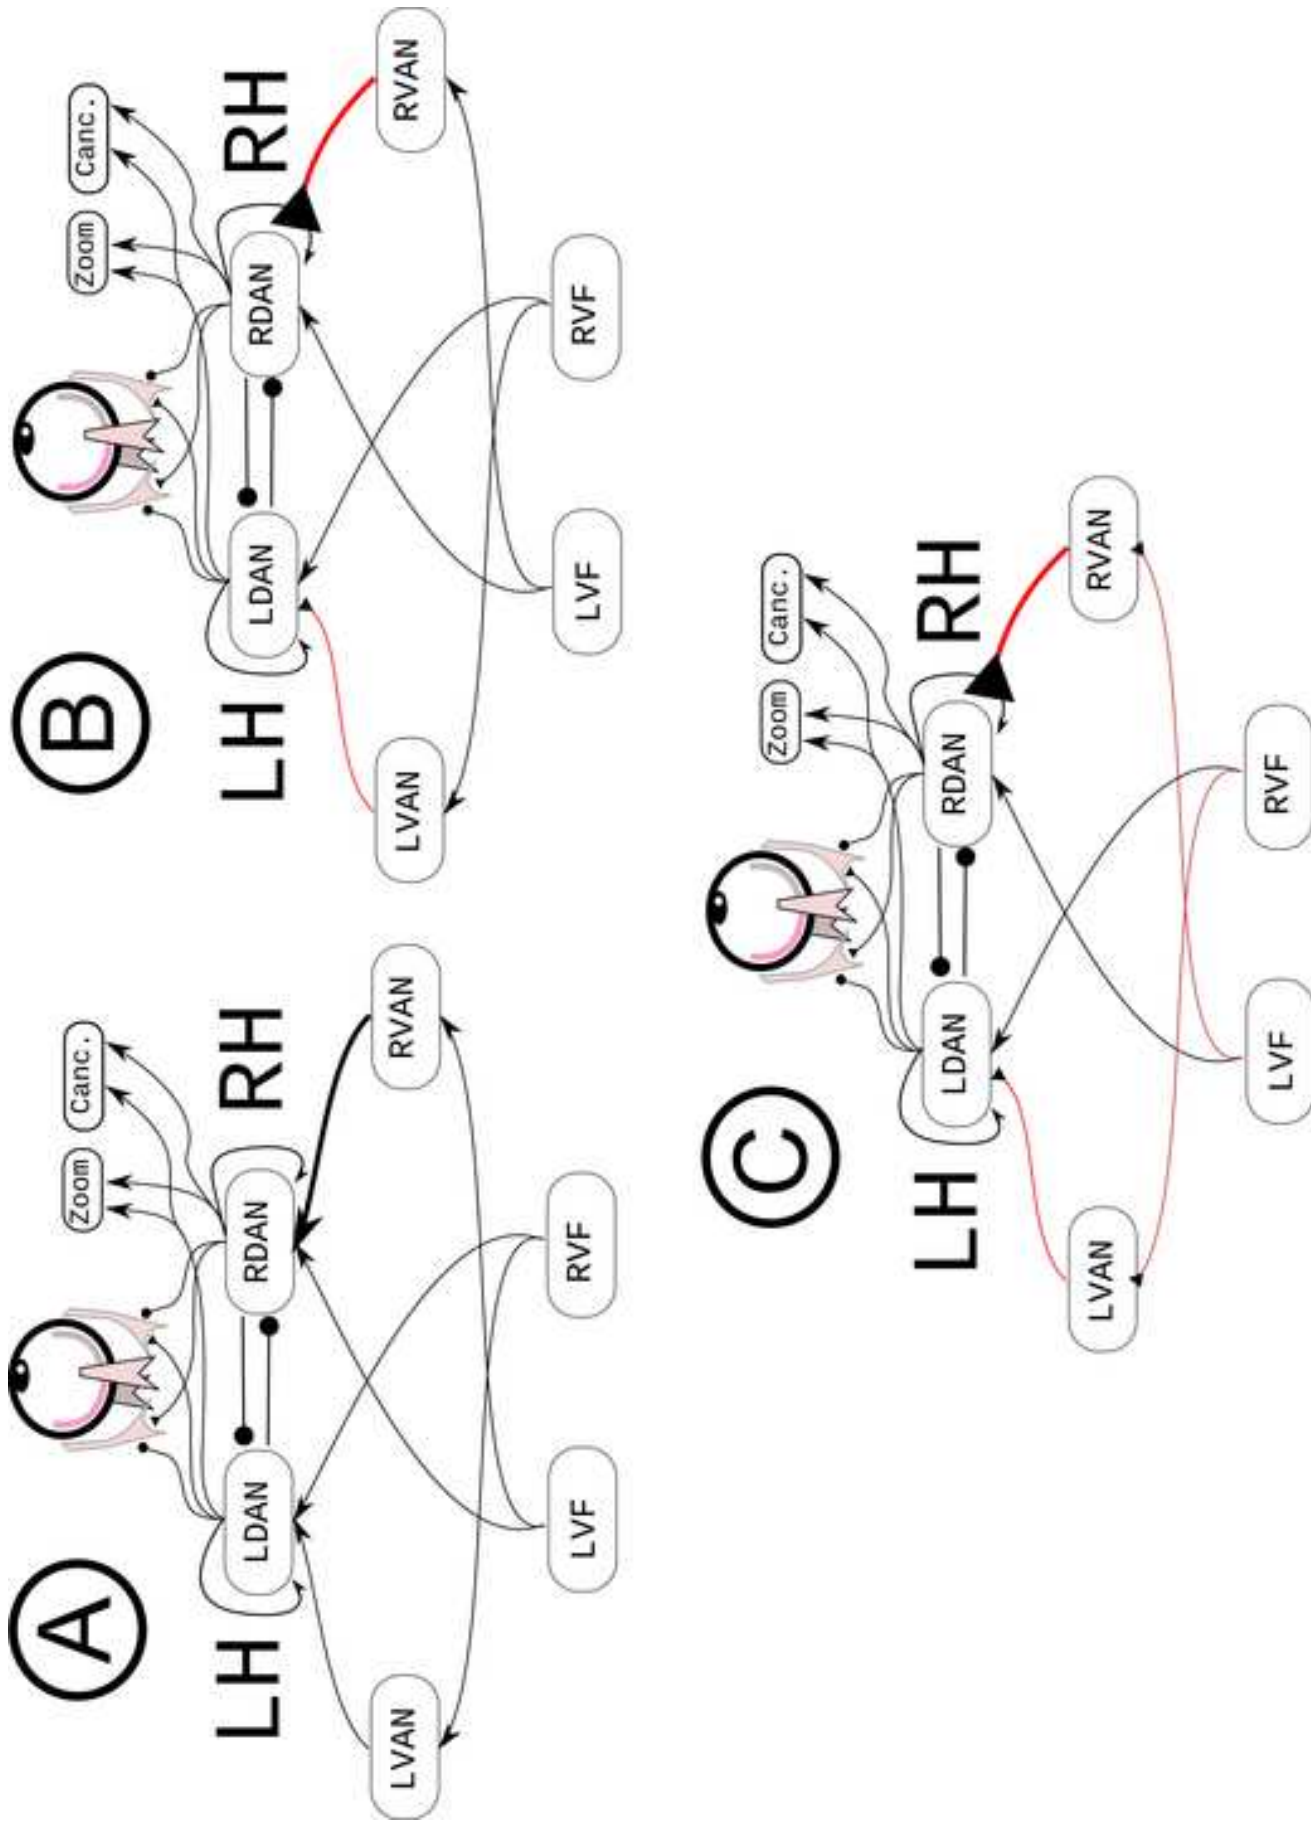

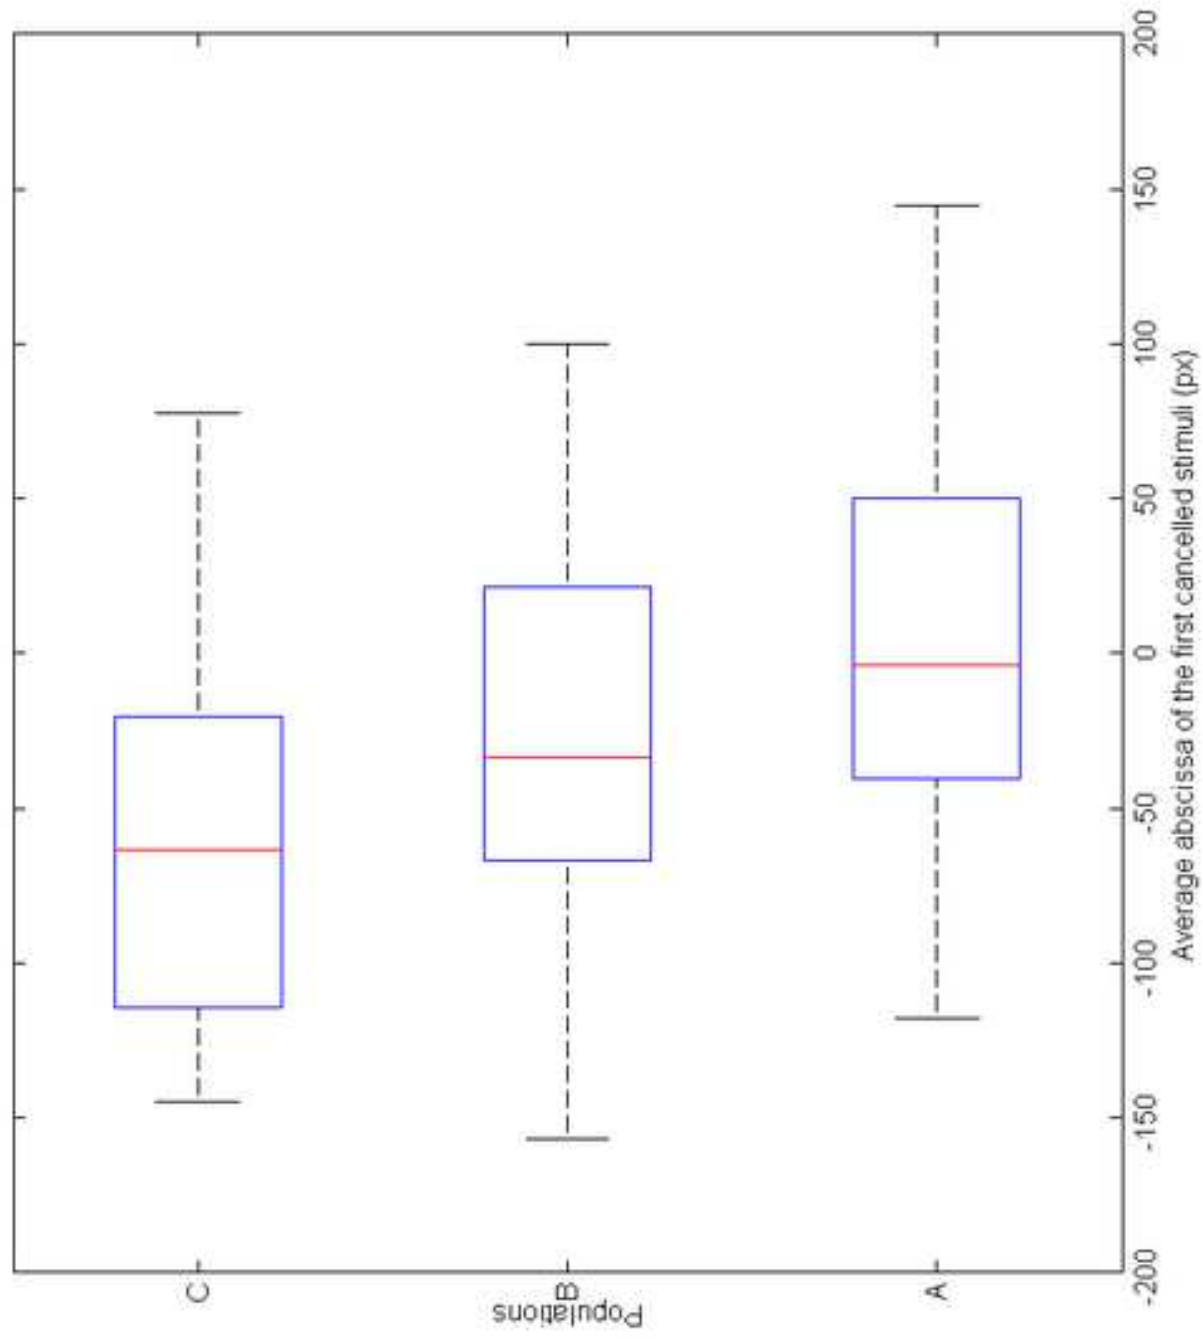

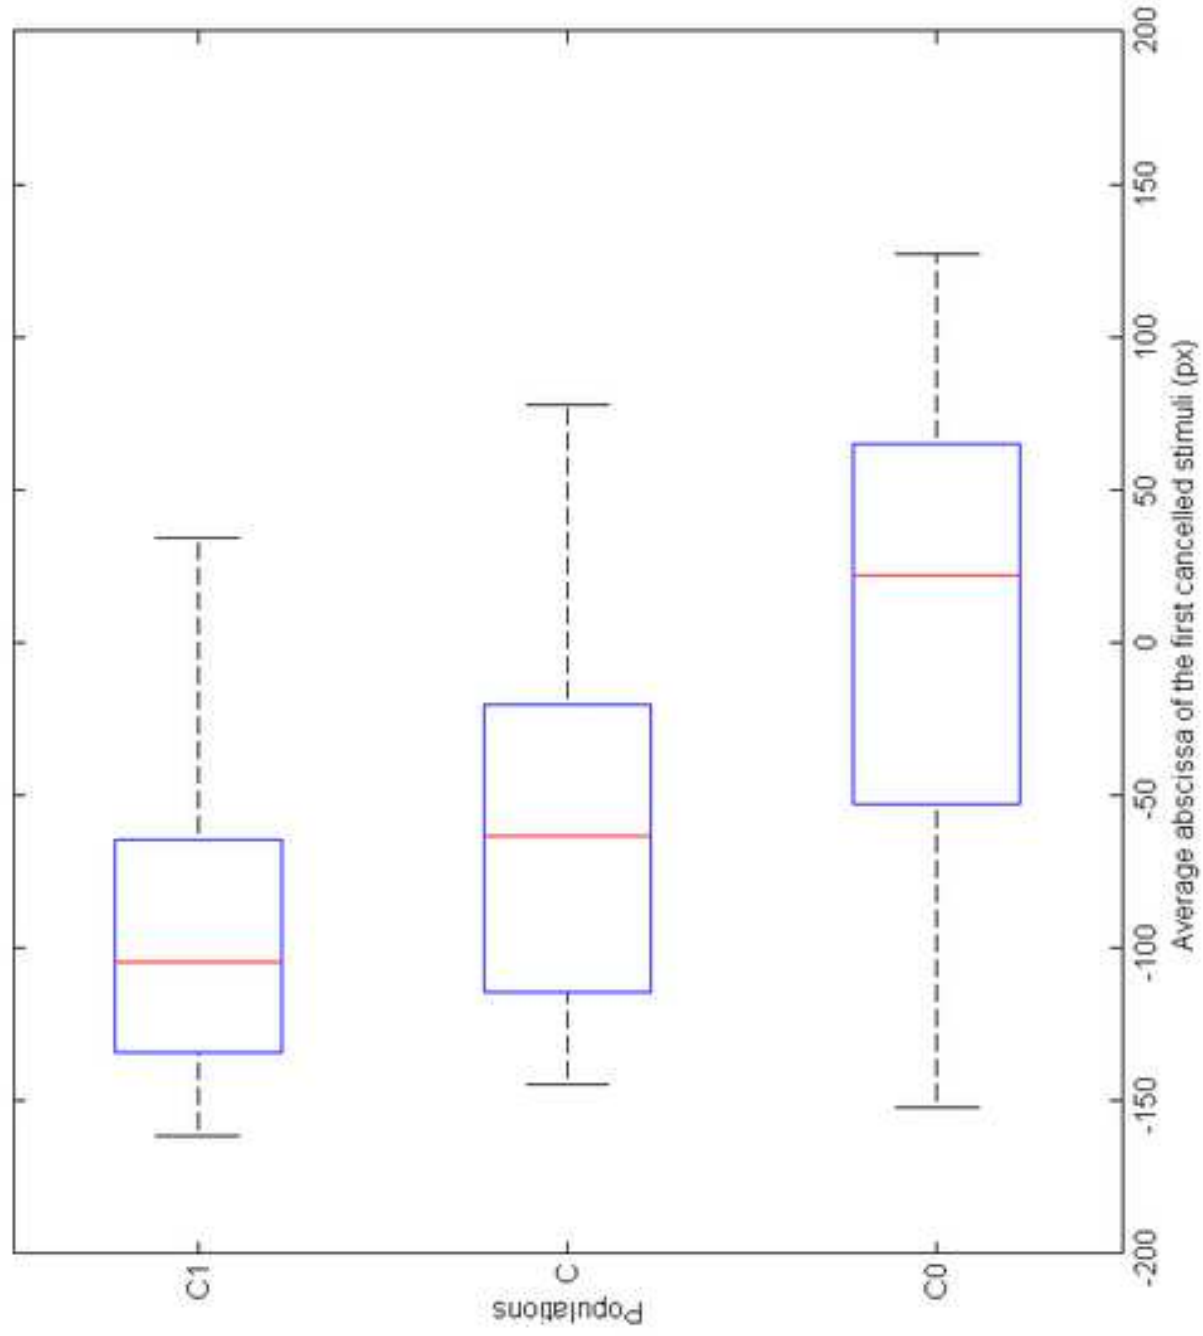

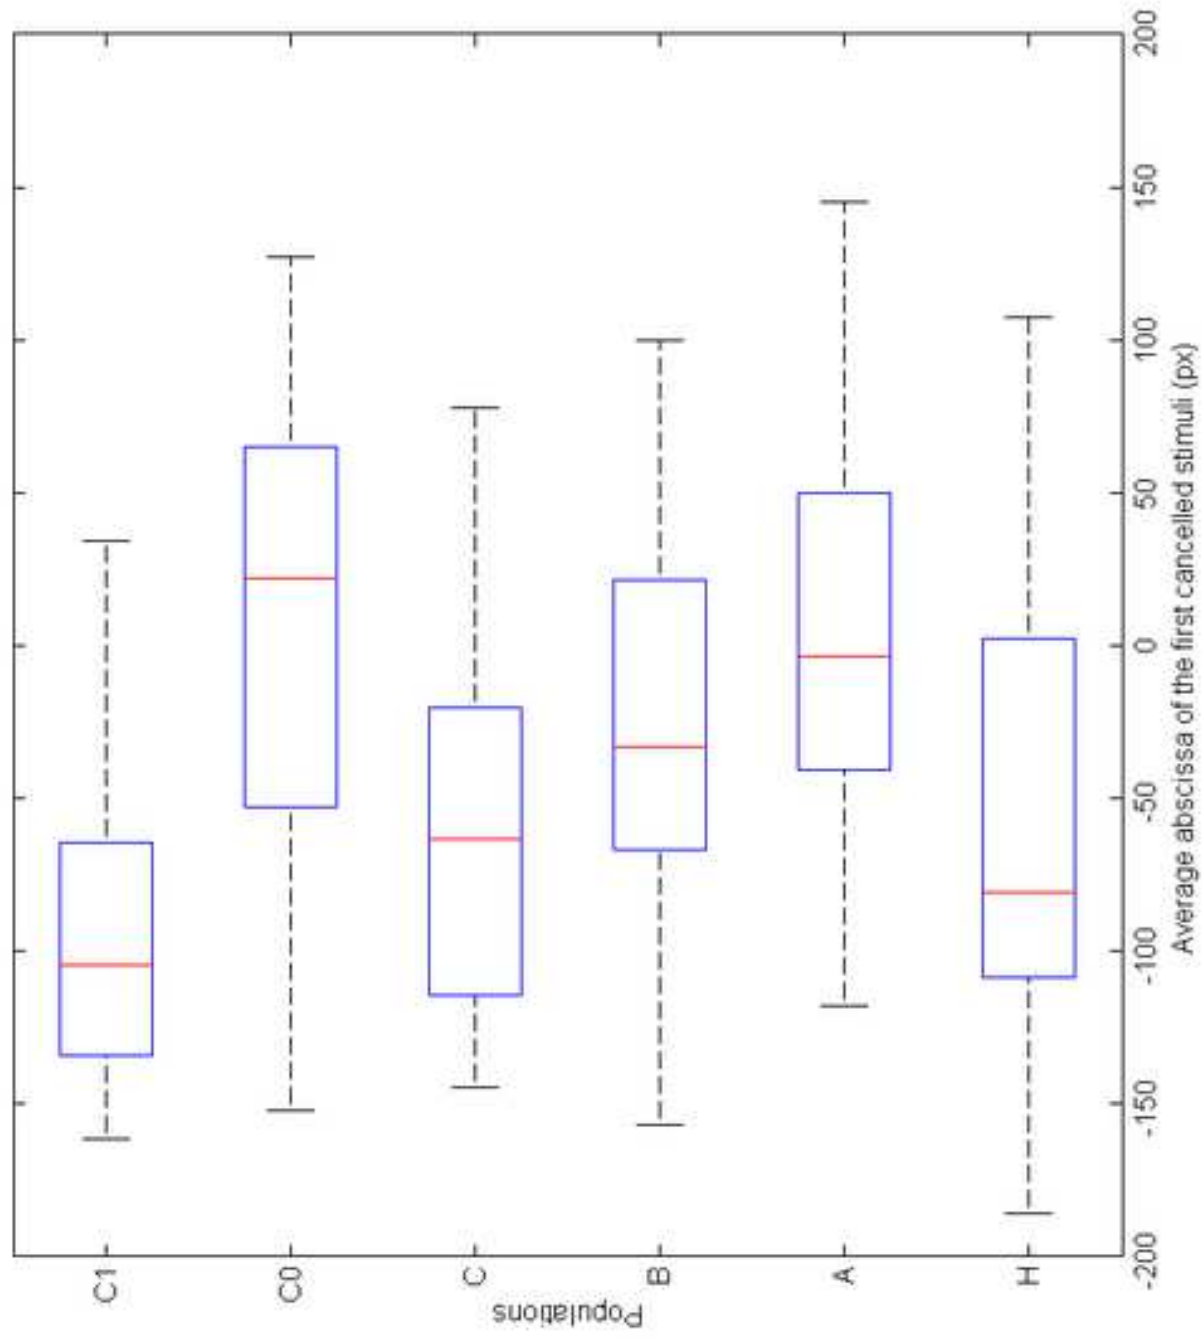



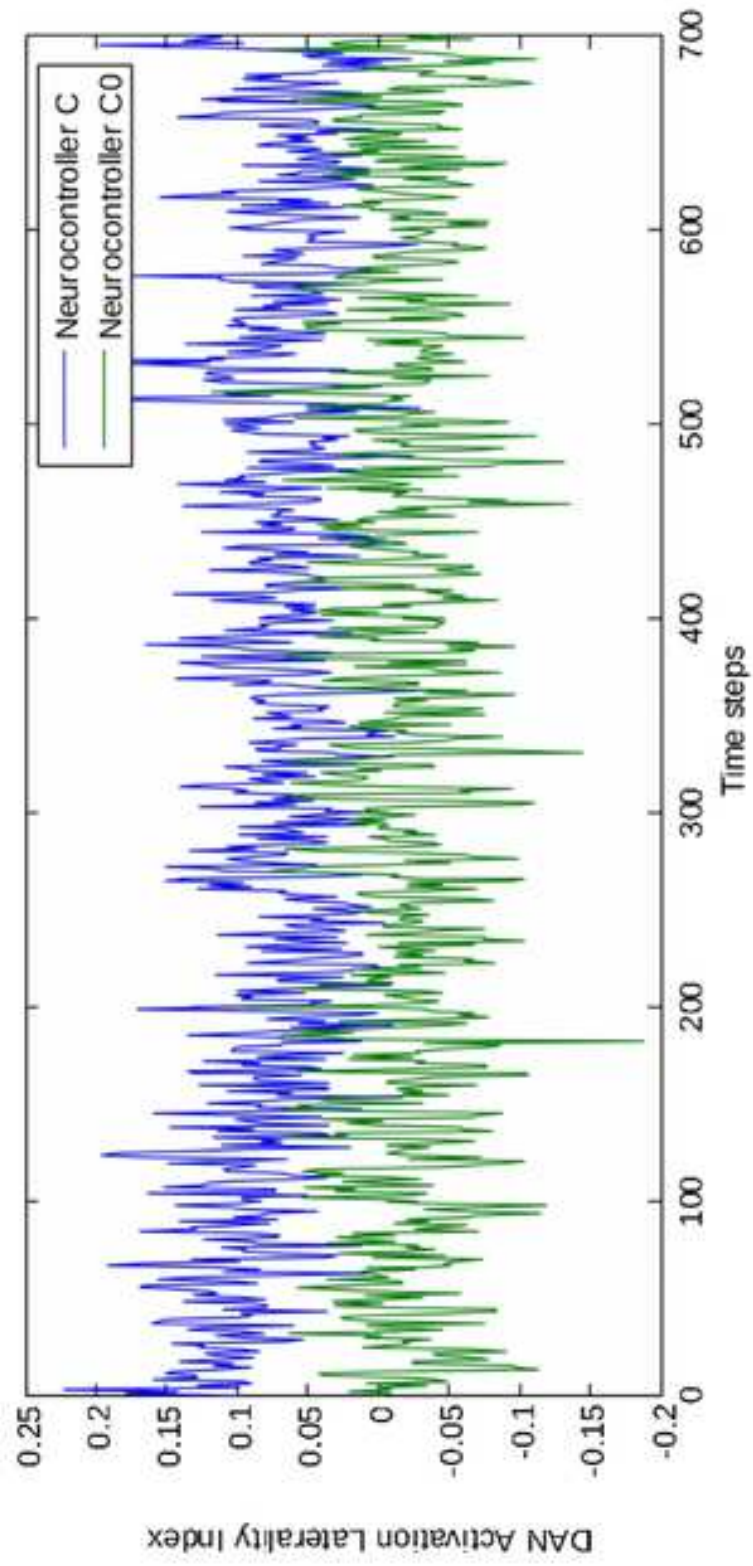

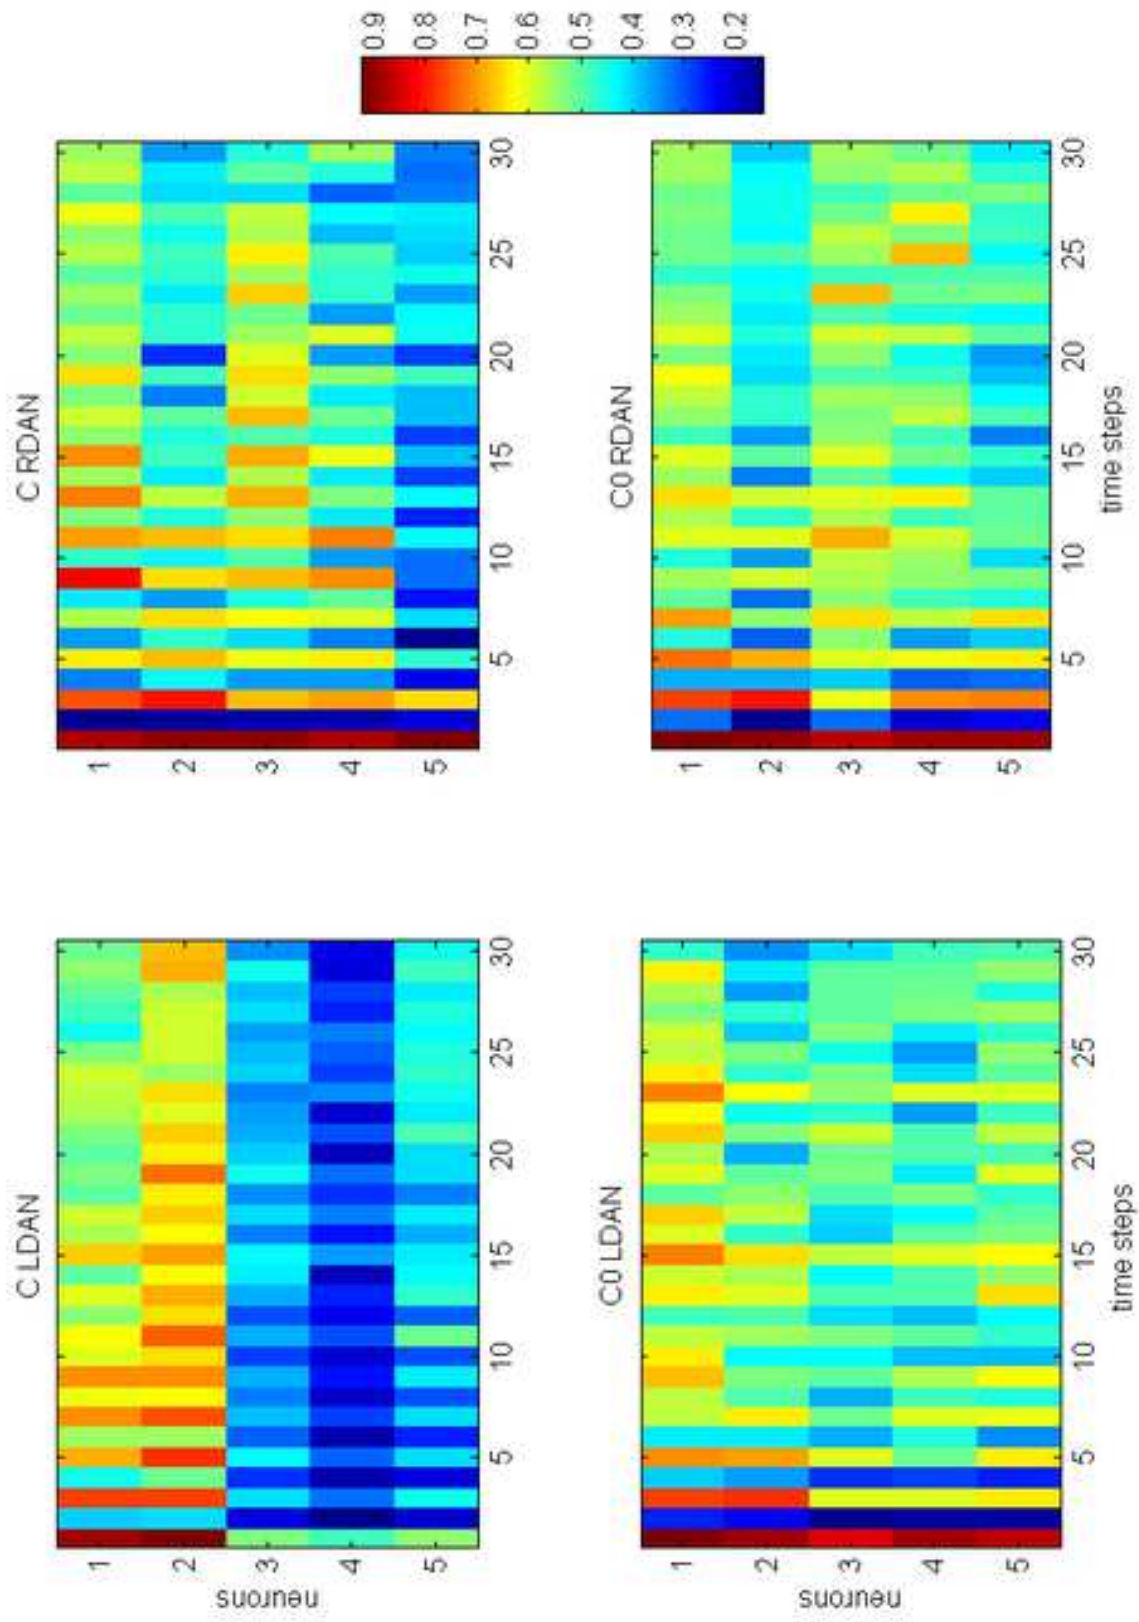

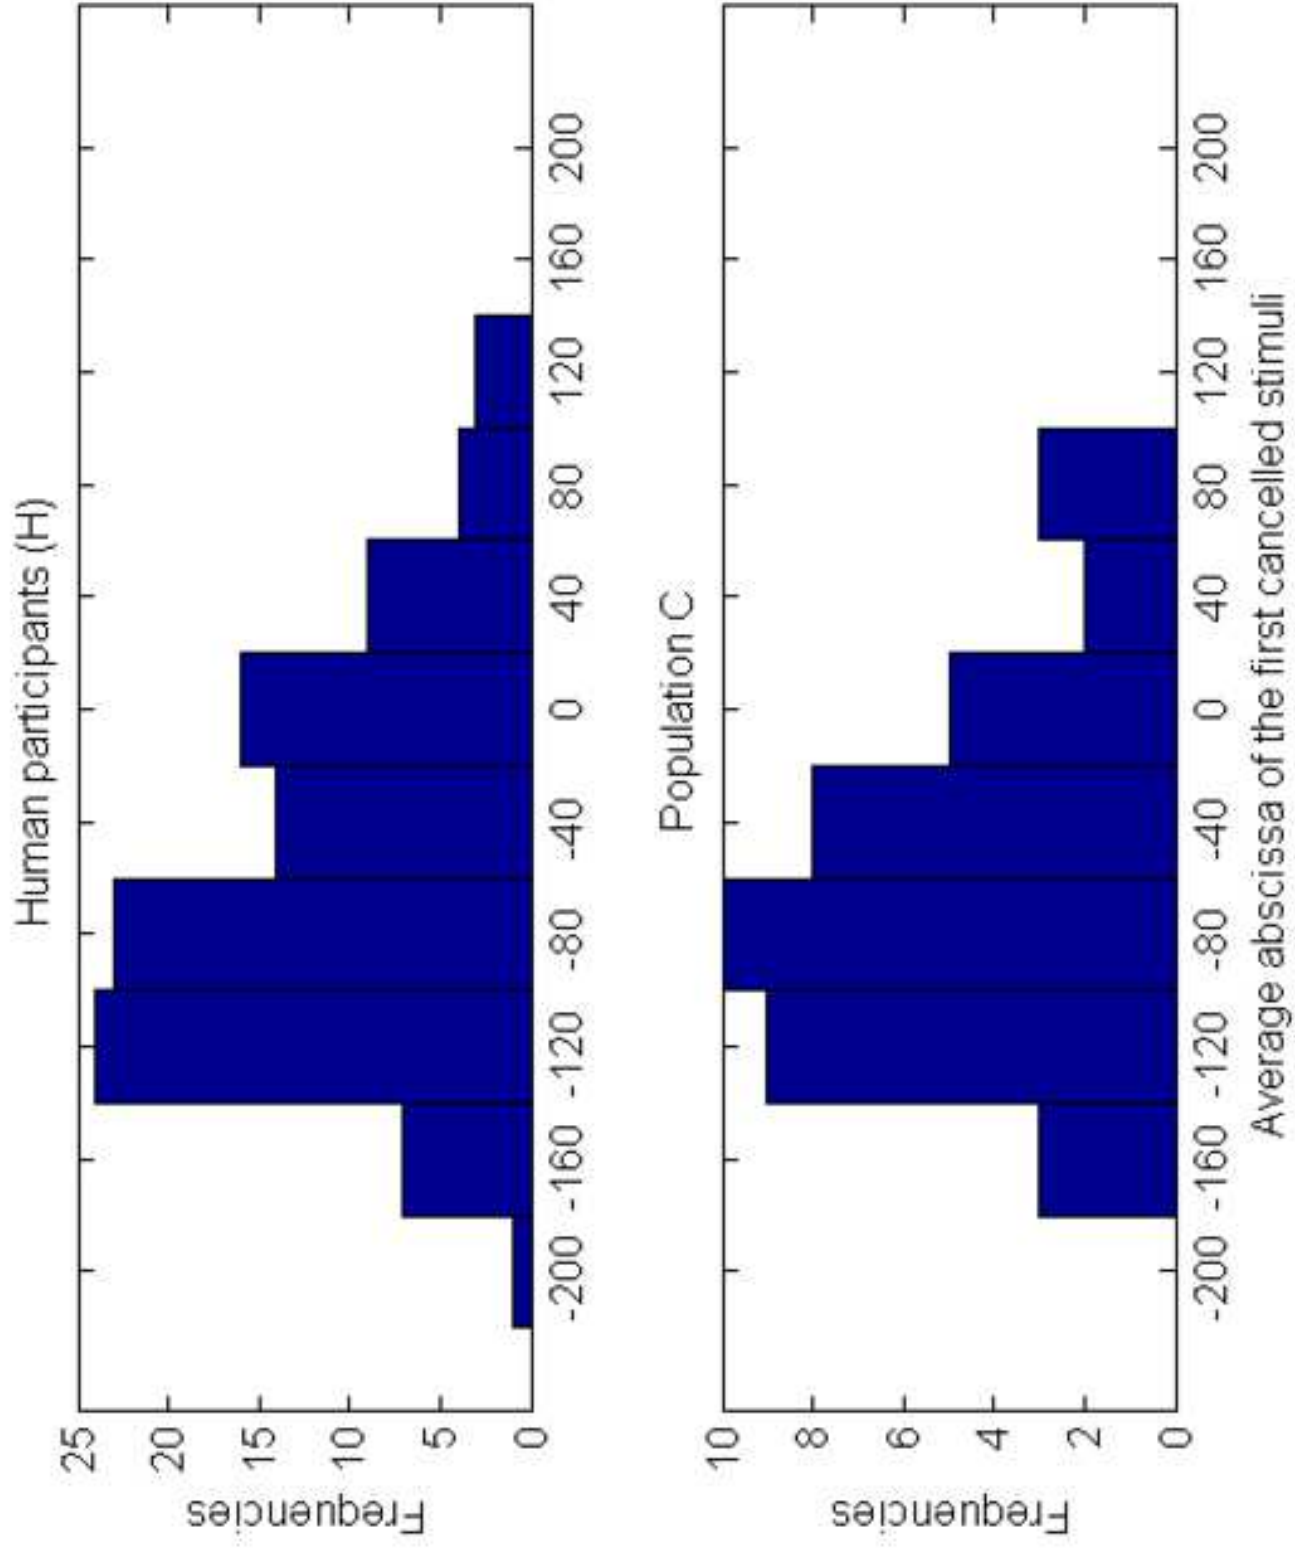

Source: https://www.biorxiv.org/content/10.1101/129171v2.full.pdf
